# Supplementary material for: Structural Transition and Antibody Binding of EBOV GP and ZIKV E Proteins from Pre-Fusion to Fusion-Initiation State
Source: MDPI journal article supplement (doi:10.3390/biom8020025), 2018-05-10

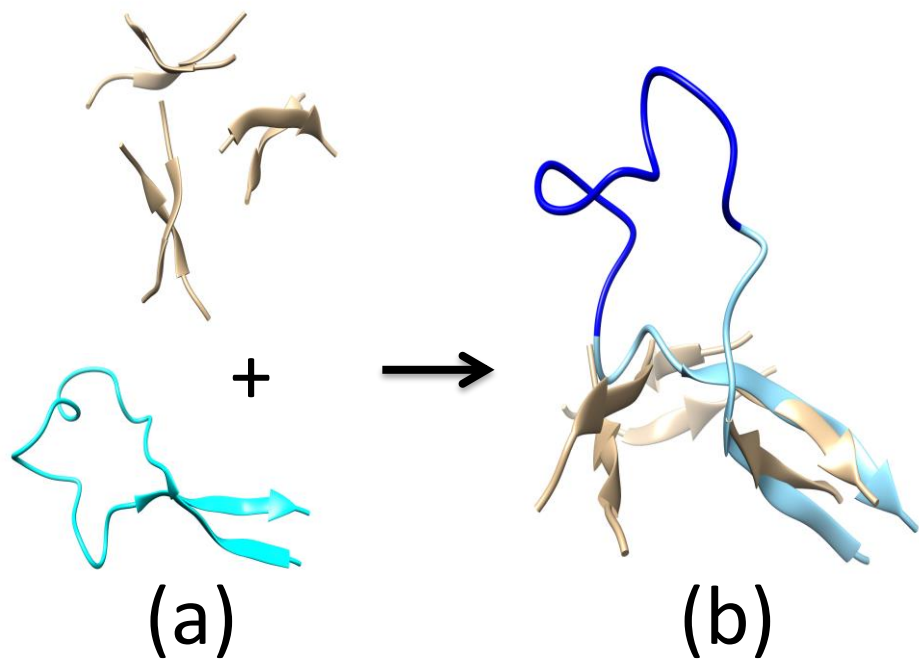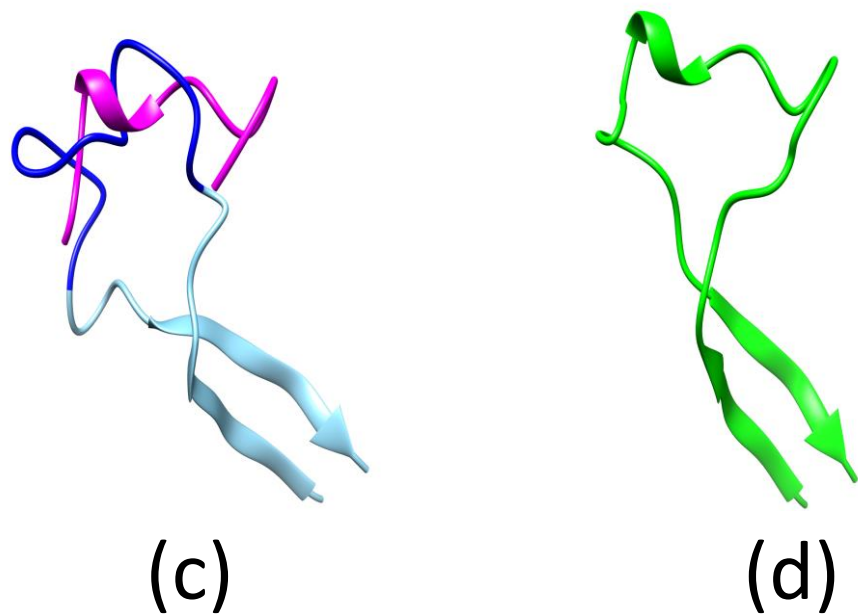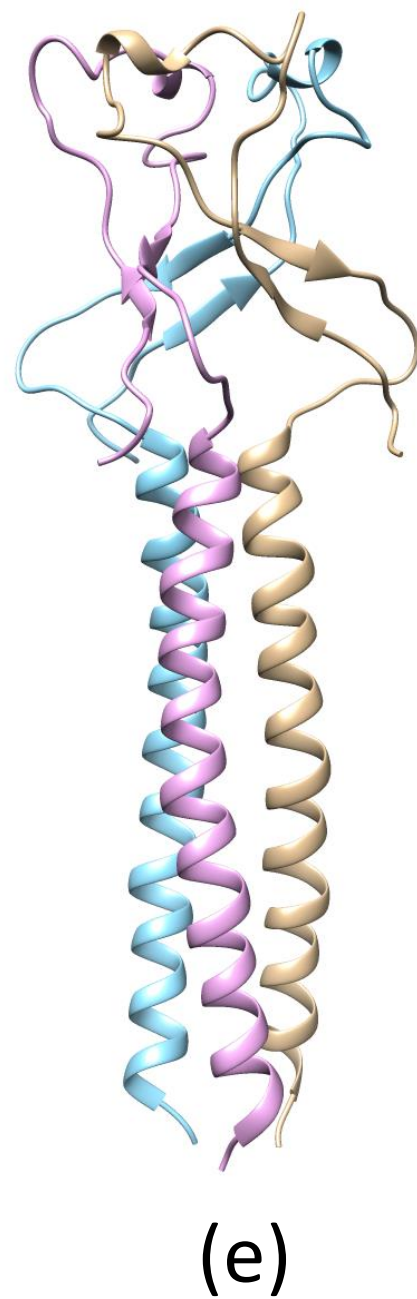

Supplement: s1 [file s1]
