# Supplementary material for: Structural Transition and Antibody Binding of EBOV GP and ZIKV E Proteins from Pre-Fusion to Fusion-Initiation State
Source: MDPI journal article supplement (doi:10.3390/biom8020025), 2018-05-10
Supplement: s1 [file s1]

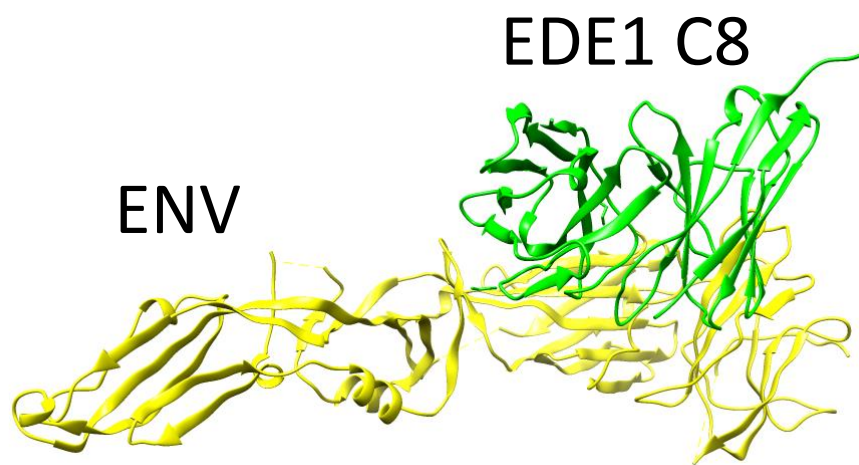

(a)

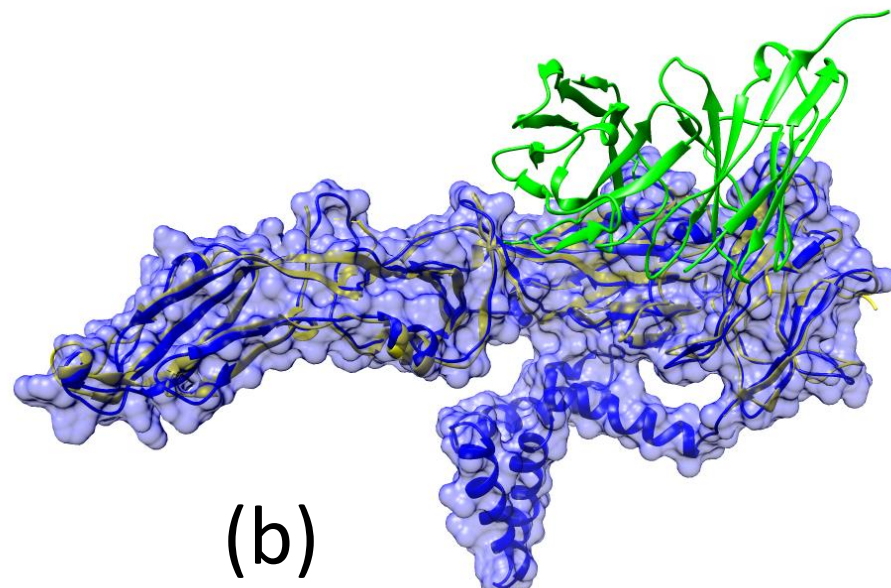

(b)

interacting  
with 2 ENVs

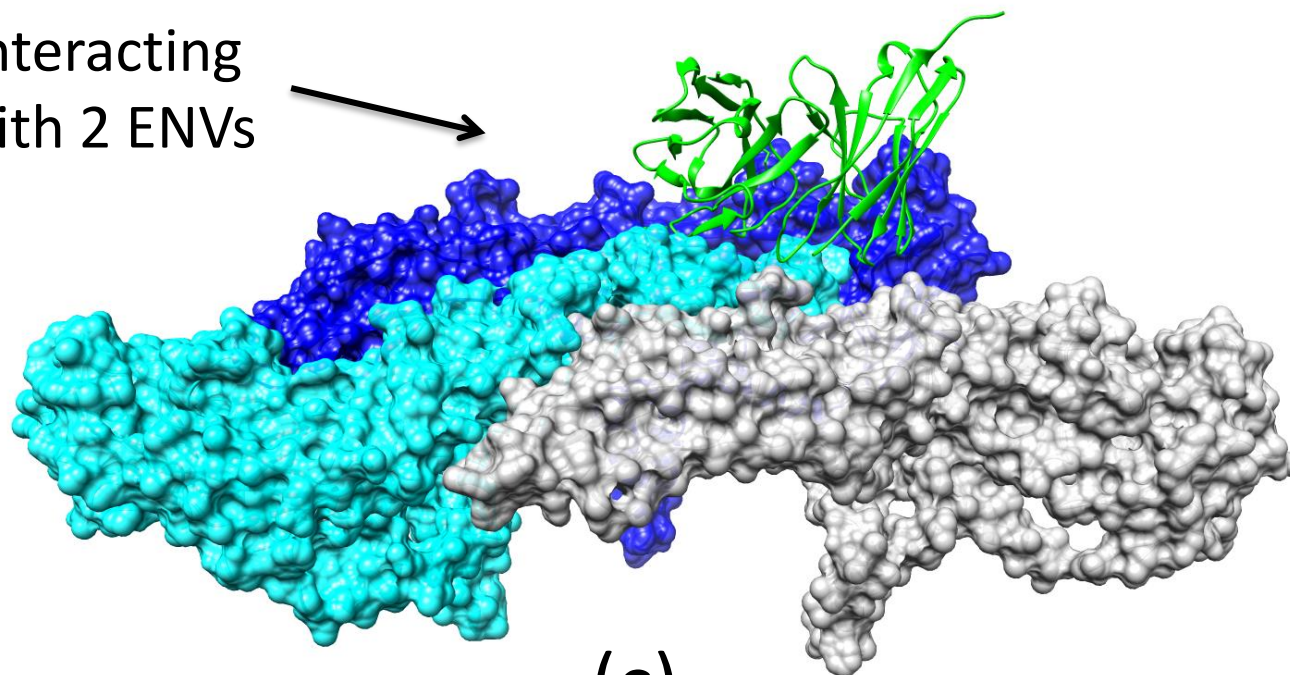

(c)
