# Supplementary material for: Structural Transition and Antibody Binding of EBOV GP and ZIKV E Proteins from Pre-Fusion to Fusion-Initiation State
Source: Biomolecules. 2018 May 10;8(2):25. doi: 10.3390/biom8020025 (PMC6022868; doi:10.3390/biom8020025)
Supplement: Supplementary file 1 [file biomolecules-08-00025-s001.zip]

Archive with 4 entries (4 files):
- figure-S1.pdf
- figure-S2.pdf
- figure-S3.pdf
- figure-S4.pdf
